# Supplementary material
Source: HighWire-hosted journal article supplement (http://ajnr-stage2.highwire.org/highwire/filestream/52048/field_highwire_adjunct_files/0/2214_tables.pdf)
Supplement: 2214_tables.pdf [file 2214_tables.pdf]

**On-line Table 1: Estimated marginal means for CCA-IMT in the 2 ethnic groups<sup>a</sup>**

| Adjusted for                  | Mean IMT (mm)     |                   | Mean Maximum IMT (mm) <sup>v</sup> |                   |
|-------------------------------|-------------------|-------------------|------------------------------------|-------------------|
|                               | Black Individuals | White Individuals | Black Individuals                  | White Individuals |
| Age and sex                   | 0.804 ± 0.008     | 0.750 ± 0.008     | 0.940 ± 0.020                      | 0.770 ± 0.020     |
| + Cardiovascular risk factors | 0.799 ± 0.008     | 0.755 ± 0.008     | 0.940 ± 0.020                      | 0.770 ± 0.020     |
| + Socioeconomic status        | 0.800 ± 0.008     | 0.754 ± 0.009     | 0.940 ± 0.020                      | 0.780 ± 0.020     |
| + CCA diameter                | 0.806 ± 0.008     | 0.749 ± 0.009     | 0.950 ± 0.020                      | 0.770 ± 0.020     |

<sup>a</sup> Cardiovascular risk factors: hypertension, diabetes, smoking pack-years, cholesterol, and BMI. Values are mean IMT ± SE. Differences between black and white are all  $P < .001$ .

**On-line Table 2: Relationship between cardiovascular risk factors and mean maximum CCA-IMT in the 2 ethnic groups from univariate and multivariate regression analysis**

| Risk Factor         | Black Individuals |                   |                                               |                   | White Individuals |                   |                                               |                   |
|---------------------|-------------------|-------------------|-----------------------------------------------|-------------------|-------------------|-------------------|-----------------------------------------------|-------------------|
|                     | Univariate        |                   | Multivariate<br>( $R^2 = 0.11$ ) <sup>a</sup> |                   | Univariate        |                   | Multivariate<br>( $R^2 = 0.20$ ) <sup>a</sup> |                   |
|                     | B                 | P                 | B                                             | P                 | B                 | P                 | B                                             | P                 |
| Age                 | 0.001             | .000 <sup>b</sup> | 0.001                                         | .000 <sup>b</sup> | 0.001             | .000 <sup>b</sup> | 0.001                                         | .000 <sup>b</sup> |
| Male sex            | 0.005             | .217              | 0.001                                         | .768              | 0.014             | .000 <sup>b</sup> | 0.015                                         | .000 <sup>b</sup> |
| Hypertension        | 0.011             | .010 <sup>b</sup> | 0.006                                         | .182              | 0.009             | .002 <sup>b</sup> | 0.002                                         | .592              |
| DM                  | 0.014             | .005 <sup>b</sup> | 0.009                                         | .085              | 0.012             | .052 <sup>b</sup> | 0.013                                         | .021 <sup>b</sup> |
| BMI                 | 0.000             | .929              | 0.000                                         | .744              | 0.000             | .792              | 0.000                                         | .956              |
| Cholesterol         | 0.003             | .161              | 0.003                                         | .068              | 0.001             | .648              | 0.002                                         | .172              |
| Smoking: pack-years | 0.000             | .138              | 0.000                                         | .322              | 0.000             | .000 <sup>b</sup> | 0.000                                         | .054              |
| Low social class    | −0.002            | .790              | −0.007                                        | .231              | 0.009             | .006 <sup>b</sup> | 0.005                                         | .099              |

<sup>a</sup> $R^2$  = proportion of variance in IMT explained by conventional risk factors.

<sup>b</sup>  $P = 0.05$ .
